# Supplementary material
Source: MDPI journal article supplement (https://www.mdpi.com/2674-1024/2/4/29)
Supplement: s1 [file s1]

**Table S1.** Final germination percentage during germination under water stress of *Solanum paniculatum* L. seeds submitted to osmopriming and control treatments.

| Osmotic Potential of the Germinative Conditions (MPa) | Osmotic Potential of Osmopriming Solutions (MPa) |       |       |       |       |
|-------------------------------------------------------|--------------------------------------------------|-------|-------|-------|-------|
|                                                       | NC                                               | −0.4  | −0.8  | −1.0  | −1.2  |
| 0.0                                                   | 99 a                                             | 100 a | 97 a  | 94 a  | 100 a |
| −0.2                                                  | 97 ab                                            | 97 ab | 95 ab | 93 ab | 100 a |
| −0.4                                                  | 26 b                                             | 68 a  | 62 ab | 69 a  | 86 a  |
| −0.6                                                  | 10 a                                             | 26 a  | 44 a  | 11 a  | 17 a  |
| −0.8                                                  | 0 a                                              | 1 a   | 0 a   | 0 a   | 0 a   |
| −1.0                                                  | 0 a                                              | 0 a   | 0 a   | 0 a   | 0 a   |

\*Means followed by same letters do not differ in Tukey's test (0.05), capital letter are compared in the columns and lower letter are compared in the lines. Data were transformed by  $\sqrt{x} + 1$ .

**Table S2.** Normal seedling percentage during germination under water stress of *Solanum paniculatum* L. seeds submitted to osmopriming and control treatments.

| Osmotic Potential of the Germinative Conditions (MPa) | Osmotic Potential of Osmopriming Solutions (MPa) |      |       |       |      |
|-------------------------------------------------------|--------------------------------------------------|------|-------|-------|------|
|                                                       | NC                                               | −0.4 | −0.8  | −1.0  | −1.2 |
| 0.0                                                   | 91a                                              | 100a | 95a   | 94a   | 98a  |
| −0.2                                                  | 95a                                              | 94a  | 95a   | 91a   | 97a  |
| −0.4                                                  | 20d                                              | 66ab | 51bcd | 55abc | 85a  |
| −0.6                                                  | 0 a                                              | 7 a  | 6 a   | 4 a   | 8 a  |
| −0.8                                                  | 0 a                                              | 0 a  | 0 a   | 0 a   | 0 a  |
| −1.0                                                  | 0 a                                              | 0 a  | 0 a   | 0 a   | 0 a  |

\*Means followed by same letters do not differ in Tukey's test (0.05), capital letter are compared in the columns and lower letter are compared in the lines. Data were transformed by  $\sqrt{x} + 1$ .

**Table S3.** Transcripts differentially expressed in primed and unprimed *Solanum paniculatum* L. seeds. Fold change was calculated using Baggerley's test considering  $p < 0.05$ .

| Gene ID                                       | Fold Change    | Annotation                                                              |
|-----------------------------------------------|----------------|-------------------------------------------------------------------------|
| PASMA_ACAGTG_L001_R1_001_trimmed_contig_10229 | 836.832.956    | dep domain-containing protein 1a isoform x1                             |
| PASMA_ACAGTG_L001_R1_001_trimmed_contig_10230 | 824.242.174    | dna repair protein rhp42                                                |
| PASMA_ACAGTG_L001_R1_001_trimmed_contig_10417 | 343.636.882    | heat shock cognate 70 kda protein 2-like                                |
| PASMA_ACAGTG_L001_R1_001_trimmed_contig_1042  | 443.005.992    | vicilin-like antimicrobial peptides 2-2-like                            |
| PASMA_ACAGTG_L001_R1_001_trimmed_contig_10492 | 298.200.969    | chd3-type chromatin-remodeling factor pickle-like                       |
| PASMA_ACAGTG_L001_R1_001_trimmed_contig_1054  | 127.721.938    | glutathione peroxidase                                                  |
| PASMA_ACAGTG_L001_R1_001_trimmed_contig_10558 | 455.587.874    | poly [ADP-ribose] polymerase 3-like                                     |
| PASMA_ACAGTG_L001_R1_001_trimmed_contig_1056  | 885.308.266    | poly [ADP-ribose] polymerase 3-like                                     |
| PASMA_ACAGTG_L001_R1_001_trimmed_contig_10620 | 1.051.406.015  | chalcone isomerase                                                      |
| PASMA_ACAGTG_L001_R1_001_trimmed_contig_10653 | 393.423.663    | transcriptional regulator                                               |
| PASMA_ACAGTG_L001_R1_001_trimmed_contig_11327 | 2.403.475.001  | multidrug transporter                                                   |
| PASMA_ACAGTG_L001_R1_001_trimmed_contig_11727 | 7.239.372.597  | iron transporter                                                        |
| PASMA_ACAGTG_L001_R1_001_trimmed_contig_1181  | 6.348.179.601  | polyprotein                                                             |
| PASMA_ACAGTG_L001_R1_001_trimmed_contig_1185  | 18.845.495.977 | transcription factor ap-2-delta                                         |
| PASMA_ACAGTG_L001_R1_001_trimmed_contig_119   | 2.477.484.801  | PREDICTED: uncharacterized protein LOC101259110                         |
| PASMA_ACAGTG_L001_R1_001_trimmed_contig_12008 | 7.520.745.843  | low quality protein:piezo-type mechanosensitive ion channel component 1 |

---

|                                               |                |                                                                |
|-----------------------------------------------|----------------|----------------------------------------------------------------|
| PASMA_ACAGTG_L001_R1_001_trimmed_contig_12252 | 2.281.654.388  | beta-glucosidase 44-like                                       |
| PASMA_ACAGTG_L001_R1_001_trimmed_contig_13008 | 5.245.362.441  | glucomannan 4-beta-mannosyltransferase 2-like                  |
| PASMA_ACAGTG_L001_R1_001_trimmed_contig_1311  | 2.562.908.145  | PREDICTED: uncharacterized protein<br>LOC102598803             |
| PASMA_ACAGTG_L001_R1_001_trimmed_contig_13194 | 9.167.227.705  | ribosomal protein l2                                           |
| PASMA_ACAGTG_L001_R1_001_trimmed_contig_13312 | 5.006.397.414  | abc transporter permease                                       |
| PASMA_ACAGTG_L001_R1_001_trimmed_contig_1334  | 2.380.308.101  | inner centromere protein                                       |
| PASMA_ACAGTG_L001_R1_001_trimmed_contig_13630 | 4.446.842.595  | aspartate-semialdehyde dehydrogenase                           |
| PASMA_ACAGTG_L001_R1_001_trimmed_contig_13671 | 5.228.761.086  | bidirectional sugar transporter sweet1-like                    |
| PASMA_ACAGTG_L001_R1_001_trimmed_contig_13713 | 3.838.366.452  | ga4 desaturase                                                 |
| PASMA_ACAGTG_L001_R1_001_trimmed_contig_14046 | 6.606.626.136  | ---NA---                                                       |
| PASMA_ACAGTG_L001_R1_001_trimmed_contig_14161 | 8.311.059.741  | rho gtpase-activating protein 24 isoform x1                    |
| PASMA_ACAGTG_L001_R1_001_trimmed_contig_14206 | 7.419.015.896  | activin receptor type-1                                        |
| PASMA_ACAGTG_L001_R1_001_trimmed_contig_1421  | 1.613.150.255  | maturase partial                                               |
| PASMA_ACAGTG_L001_R1_001_trimmed_contig_1426  | 3.075.501.223  | 2s sulfur-rich seed storage protein 2-like                     |
| PASMA_ACAGTG_L001_R1_001_trimmed_contig_144   | 1.866.351.943  | thiamine biosynthesis protein                                  |
| PASMA_ACAGTG_L001_R1_001_trimmed_contig_145   | 1.840.886.345  | polyadenylate-binding protein 8-like                           |
| PASMA_ACAGTG_L001_R1_001_trimmed_contig_146   | 2.759.956.924  | high affinity camp phosphodiesterase                           |
| PASMA_ACAGTG_L001_R1_001_trimmed_contig_14734 | 18.908.311.774 | ribulose biphosphate carboxylase small chloro-<br>plastic-like |
| PASMA_ACAGTG_L001_R1_001_trimmed_contig_14796 | 31.527.702.705 | exonuclease v subunit beta                                     |

---

|                                               |                |                                                                         |
|-----------------------------------------------|----------------|-------------------------------------------------------------------------|
| PASMA_ACAGTG_L001_R1_001_trimmed_contig_15075 | 5.668.217.038  | family transcriptional regulator                                        |
| PASMA_ACAGTG_L001_R1_001_trimmed_contig_15174 | 18.821.312.239 | replication protein a 70 kda dna-binding subunit b-like                 |
| PASMA_ACAGTG_L001_R1_001_trimmed_contig_15325 | 19.510.548.770 | replication protein a 70 kda dna-binding subunit b-like                 |
| PASMA_ACAGTG_L001_R1_001_trimmed_contig_15916 | 12.772.096.432 | radical sam protein                                                     |
| PASMA_ACAGTG_L001_R1_001_trimmed_contig_1638  | 6.219.127.628  | 11s seed storage globulin                                               |
| PASMA_ACAGTG_L001_R1_001_trimmed_contig_1695  | 4.198.733.300  | androgen receptor                                                       |
| PASMA_ACAGTG_L001_R1_001_trimmed_contig_16971 | 2.923.650.738  | 2-methylcitrate dehydratase                                             |
| PASMA_ACAGTG_L001_R1_001_trimmed_contig_1710  | 2.994.866.378  | PREDICTED: uncharacterized protein LOC102578250                         |
| PASMA_ACAGTG_L001_R1_001_trimmed_contig_1719  | 3.515.092.540  | non-specific lipid-transfer protein 2-like                              |
| PASMA_ACAGTG_L001_R1_001_trimmed_contig_1736  | 12.401.097.728 | sh2 domain containing protein                                           |
| PASMA_ACAGTG_L001_R1_001_trimmed_contig_1774  | 2.464.410.290  | snf1-related protein kinase regulatory subunit gamma-like<br>pv42a-like |
| PASMA_ACAGTG_L001_R1_001_trimmed_contig_17947 | 11.116.804.902 | dna-directed rna polymerase i subunit rpa1-like                         |
| PASMA_ACAGTG_L001_R1_001_trimmed_contig_1801  | 4.975.597.707  | kda class i heat shock protein 3                                        |
| PASMA_ACAGTG_L001_R1_001_trimmed_contig_18192 | 26.831.948.132 | teichoic acid biosynthesis protein                                      |
| PASMA_ACAGTG_L001_R1_001_trimmed_contig_1923  | 1.761.960.007  | minor structural protein                                                |
| PASMA_ACAGTG_L001_R1_001_trimmed_contig_1938  | 3.126.243.422  | leucine-rich repeat-containing protein 16a-like                         |
| PASMA_ACAGTG_L001_R1_001_trimmed_contig_194   | 1.932.976.851  | methionyl-trna formyltransferase                                        |
| PASMA_ACAGTG_L001_R1_001_trimmed_contig_1956  | 9.128.201.757  | phenylalanine ammonia-lyase-like                                        |
| PASMA_ACAGTG_L001_R1_001_trimmed_contig_19832 | 13.849.702.420 | poly [ADP-ribose] polymerase 3-like                                     |

---

|                                               |                |                                                             |
|-----------------------------------------------|----------------|-------------------------------------------------------------|
| PASMA_ACAGTG_L001_R1_001_trimmed_contig_19839 | 10.818.052.779 | ribonuclease h                                              |
| PASMA_ACAGTG_L001_R1_001_trimmed_contig_19886 | 5.133.015.238  | integrase core domain containing protein                    |
| PASMA_ACAGTG_L001_R1_001_trimmed_contig_2004  | 1.515.285.207  | elongation factor 1-                                        |
| PASMA_ACAGTG_L001_R1_001_trimmed_contig_2005  | 5.313.090.529  | duf21 domain-containing protein at4g14240-like              |
| PASMA_ACAGTG_L001_R1_001_trimmed_contig_2018  | 3.609.418.227  | ec protein homolog 2-like                                   |
| PASMA_ACAGTG_L001_R1_001_trimmed_contig_20743 | 4.398.382.668  | nad-glutamate dehydrogenase                                 |
| PASMA_ACAGTG_L001_R1_001_trimmed_contig_20781 | 13.580.395.100 | transcriptional activator                                   |
| PASMA_ACAGTG_L001_R1_001_trimmed_contig_2136  | 3.320.480.855  | probable aquaporin tip3-2-like                              |
| PASMA_ACAGTG_L001_R1_001_trimmed_contig_21837 | 26.018.065.344 | 9-divinyl ether synthase-like                               |
| PASMA_ACAGTG_L001_R1_001_trimmed_contig_221   | 1.736.988.382  | elongation factor 1-alpha                                   |
| PASMA_ACAGTG_L001_R1_001_trimmed_contig_222   | 2.227.589.218  | translation elongation factor 1- partial                    |
| PASMA_ACAGTG_L001_R1_001_trimmed_contig_22593 | 8.087.975.366  | chalcone isomerase                                          |
| PASMA_ACAGTG_L001_R1_001_trimmed_contig_23    | 2.798.285.917  | abc-2 type transporter                                      |
| PASMA_ACAGTG_L001_R1_001_trimmed_contig_23208 | 3.043.727.720  | tellurium resistance protein                                |
| PASMA_ACAGTG_L001_R1_001_trimmed_contig_239   | 7.495.581.120  | kelch repeat protein                                        |
| PASMA_ACAGTG_L001_R1_001_trimmed_contig_24085 | 4.658.024.932  | maleylacetoacetate isomerase                                |
| PASMA_ACAGTG_L001_R1_001_trimmed_contig_2441  | 5.205.380.718  | evolutionarily conserved c-terminal region 2 iso-<br>form 1 |
| PASMA_ACAGTG_L001_R1_001_trimmed_contig_254   | 3.116.297.551  | oleosin 1-like                                              |
| PASMA_ACAGTG_L001_R1_001_trimmed_contig_2645  | 2.682.734.698  | translocator protein homolog                                |

---

|                                               |                |                                                       |
|-----------------------------------------------|----------------|-------------------------------------------------------|
| PASMA_ACAGTG_L001_R1_001_trimmed_contig_26597 | 16.625.319.737 | exonuclease v subunit beta                            |
| PASMA_ACAGTG_L001_R1_001_trimmed_contig_2688  | 2.473.415.257  | aspartic proteinase                                   |
| PASMA_ACAGTG_L001_R1_001_trimmed_contig_26882 | 52.287.519.064 | hypothetical protein PHAVU_011G058900g                |
| PASMA_ACAGTG_L001_R1_001_trimmed_contig_2711  | 3.363.229.194  | elongation factor g                                   |
| PASMA_ACAGTG_L001_R1_001_trimmed_contig_2730  | 2.233.549.418  | reticulon-like protein b13-like                       |
| PASMA_ACAGTG_L001_R1_001_trimmed_contig_2733  | 3.550.761.336  | wd repeat protein                                     |
| PASMA_ACAGTG_L001_R1_001_trimmed_contig_2828  | 3.499.836.634  | 1-hydroxy-2-methyl-2- -butenyl 4-diphosphate synthase |
| PASMA_ACAGTG_L001_R1_001_trimmed_contig_2884  | 3.731.276.497  | hmg1 2-like                                           |
| PASMA_ACAGTG_L001_R1_001_trimmed_contig_2915  | 2.822.775.540  | adenine dna phage-associated                          |
| PASMA_ACAGTG_L001_R1_001_trimmed_contig_2973  | 5.255.162.523  | ribosomal biogenesis gtpase                           |
| PASMA_ACAGTG_L001_R1_001_trimmed_contig_2977  | 2.315.471.216  | probable aquaporin tip3-2-like                        |
| PASMA_ACAGTG_L001_R1_001_trimmed_contig_306   | 1.528.388.975  | non-specific lipid-transfer protein a-like            |
| PASMA_ACAGTG_L001_R1_001_trimmed_contig_3102  | 2.633.437.115  | hypothetical protein TPHA_0H03010                     |
| PASMA_ACAGTG_L001_R1_001_trimmed_contig_31366 | 14.047.171.155 | beige beach domain containing protein                 |
| PASMA_ACAGTG_L001_R1_001_trimmed_contig_3233  | 3.334.089.026  | homeobox protein dbx2                                 |
| PASMA_ACAGTG_L001_R1_001_trimmed_contig_3284  | 9.985.104.723  | glutamate synthase                                    |
| PASMA_ACAGTG_L001_R1_001_trimmed_contig_33325 | 41.602.687.084 | alpha- -mannosyltransferase                           |
| PASMA_ACAGTG_L001_R1_001_trimmed_contig_334   | 1.763.386.152  | nucleocapsid protein                                  |
| PASMA_ACAGTG_L001_R1_001_trimmed_contig_339   | 1.660.837.895  | malate glyoxysomal-like                               |

---

|                                              |                |                                                                    |
|----------------------------------------------|----------------|--------------------------------------------------------------------|
| PASMA_ACAGTG_L001_R1_001_trimmed_contig_3405 | 1.643.314.511  | polyubiquitin containing 7 ubiquitin monomers                      |
| PASMA_ACAGTG_L001_R1_001_trimmed_contig_3417 | 16.143.622.963 | gdsl esterase lipase at5g03820-like                                |
| PASMA_ACAGTG_L001_R1_001_trimmed_contig_3459 | 6.327.211.939  | transposon mudra-like                                              |
| PASMA_ACAGTG_L001_R1_001_trimmed_contig_3485 | 2.173.200.672  | peroxidase 12-like                                                 |
| PASMA_ACAGTG_L001_R1_001_trimmed_contig_35   | 1.833.792.772  | eukaryotic translation initiation factor 3 subunit a               |
| PASMA_ACAGTG_L001_R1_001_trimmed_contig_3565 | 5.463.143.348  | tubulin beta-1 chain                                               |
| PASMA_ACAGTG_L001_R1_001_trimmed_contig_3594 | 3.978.078.221  | glycoside hydrolase                                                |
| PASMA_ACAGTG_L001_R1_001_trimmed_contig_3683 | 3.004.004.885  | cullin associated nedd8 dissociated protein 1                      |
| PASMA_ACAGTG_L001_R1_001_trimmed_contig_3684 | 4.681.627.018  | 50s ribosomal protein l15                                          |
| PASMA_ACAGTG_L001_R1_001_trimmed_contig_3929 | 2.597.506.807  | dnaj protein homolog 2-like                                        |
| PASMA_ACAGTG_L001_R1_001_trimmed_contig_3949 | 4.589.697.669  | ndp-sugar dehydrogenase like udp-glucose<br>dehydrogenase          |
| PASMA_ACAGTG_L001_R1_001_trimmed_contig_397  | 1.873.813.777  | membrane protein                                                   |
| PASMA_ACAGTG_L001_R1_001_trimmed_contig_4082 | 2.255.207.958  | cold shock protein cs66-like                                       |
| PASMA_ACAGTG_L001_R1_001_trimmed_contig_4244 | 4.772.017.845  | cell envelope biogenesis protein                                   |
| PASMA_ACAGTG_L001_R1_001_trimmed_contig_4403 | 1.792.963.843  | late embryogenesis abundant protein group 8                        |
| PASMA_ACAGTG_L001_R1_001_trimmed_contig_4435 | 3.184.169.538  | glycosyltransferase family 2 protein                               |
| PASMA_ACAGTG_L001_R1_001_trimmed_contig_452  | 4.451.642.652  | thyroid hormone receptor-associated protein 3-like iso-<br>form x1 |
| PASMA_ACAGTG_L001_R1_001_trimmed_contig_4524 | 4.682.518.045  | membrane protein                                                   |
| PASMA_ACAGTG_L001_R1_001_trimmed_contig_470  | 2.128.271.744  | cell death abnormality protein partial                             |

---

|                                              |                 |                                                               |
|----------------------------------------------|-----------------|---------------------------------------------------------------|
| PASMA_ACAGTG_L001_R1_001_trimmed_contig_4776 | 2.995.038.757   | sepiapterin reductase a                                       |
| PASMA_ACAGTG_L001_R1_001_trimmed_contig_4808 | 3.273.675.253   | histidine-rich glyco                                          |
| PASMA_ACAGTG_L001_R1_001_trimmed_contig_488  | -26.626.873.804 | nad(p)h dehydrogenase (quinone) fqr1-like 1                   |
| PASMA_ACAGTG_L001_R1_001_trimmed_contig_5032 | 8.078.838.491   | glycosyl hydrolase family 35                                  |
| PASMA_ACAGTG_L001_R1_001_trimmed_contig_52   | 2.520.354.433   | cysteine protease cp8                                         |
| PASMA_ACAGTG_L001_R1_001_trimmed_contig_5231 | 5.850.916.714   | protein scribble-like partial                                 |
| PASMA_ACAGTG_L001_R1_001_trimmed_contig_5245 | 4.914.594.340   | protein creg1-like                                            |
| PASMA_ACAGTG_L001_R1_001_trimmed_contig_527  | 2.512.757.430   | transcription accessory protein (s1 rna-binding domain)       |
| PASMA_ACAGTG_L001_R1_001_trimmed_contig_5291 | 2.034.738.089   | low-temperature-induced 65 kda protein                        |
| PASMA_ACAGTG_L001_R1_001_trimmed_contig_531  | 4.064.996.368   | burp domain-containing protein 3-like                         |
| PASMA_ACAGTG_L001_R1_001_trimmed_contig_5352 | 8.294.031.629   | replication protein a 70 kda dna-binding subunit b-like       |
| PASMA_ACAGTG_L001_R1_001_trimmed_contig_5501 | 6.526.189.698   | ribosomal subunit interface protein                           |
| PASMA_ACAGTG_L001_R1_001_trimmed_contig_5519 | 3.404.236.619   | glutathione gamma-glutamylcysteinyltransferase                |
| PASMA_ACAGTG_L001_R1_001_trimmed_contig_5548 | -53.082.952.951 | small heat shock protein                                      |
| PASMA_ACAGTG_L001_R1_001_trimmed_contig_5756 | 2.131.231.050   | vacuolar-processing enzyme-like                               |
| PASMA_ACAGTG_L001_R1_001_trimmed_contig_5914 | 7.526.268.102   | thiazole synthase                                             |
| PASMA_ACAGTG_L001_R1_001_trimmed_contig_5927 | 3.803.126.296   | nuclear polyadenylated rna-binding protein 4-like iso-form x1 |
| PASMA_ACAGTG_L001_R1_001_trimmed_contig_599  | 5.454.159.471   | homoserine dehydrogenase                                      |
| PASMA_ACAGTG_L001_R1_001_trimmed_contig_6228 | 3.397.603.039   | protein dehydration-induced 19 homolog 3-like                 |



---

|                                              |               |                                                                  |
|----------------------------------------------|---------------|------------------------------------------------------------------|
| PASMA_ACAGTG_L001_R1_001_trimmed_contig_625  | 1.413.612.154 | late embryogenesis abundant protein                              |
| PASMA_ACAGTG_L001_R1_001_trimmed_contig_626  | 2.241.694.741 | dead-box atp-dependent rna helicase 7-like                       |
| PASMA_ACAGTG_L001_R1_001_trimmed_contig_636  | 3.413.585.546 | general transcription factor 3c polypeptide 5-like               |
| PASMA_ACAGTG_L001_R1_001_trimmed_contig_6404 | 2.871.272.701 | methyl-accepting chemotaxis sensory transducer with cache sensor |
| PASMA_ACAGTG_L001_R1_001_trimmed_contig_6434 | 8.431.214.734 | protamine p1                                                     |
| PASMA_ACAGTG_L001_R1_001_trimmed_contig_6440 | 7.787.390.449 | peptidase m16                                                    |
| PASMA_ACAGTG_L001_R1_001_trimmed_contig_6508 | 2.488.828.271 | alginate o-acetyltransferase                                     |
| PASMA_ACAGTG_L001_R1_001_trimmed_contig_6576 | 7.244.611.783 | heat shock factor protein hsf30-like                             |
| PASMA_ACAGTG_L001_R1_001_trimmed_contig_6590 | 3.518.266.039 | aspartate aminotransferase                                       |
| PASMA_ACAGTG_L001_R1_001_trimmed_contig_6783 | 5.493.236.059 | rho guanine nucleotide exchange factor 10-like protein           |
| PASMA_ACAGTG_L001_R1_001_trimmed_contig_7056 | 3.725.513.127 | ornithine carbamoyltransferase                                   |
| PASMA_ACAGTG_L001_R1_001_trimmed_contig_7089 | 3.807.393.513 | sugar transferase                                                |
| PASMA_ACAGTG_L001_R1_001_trimmed_contig_7098 | 5.321.197.489 | thiamine thiazole synthase chloroplastic-like                    |
| PASMA_ACAGTG_L001_R1_001_trimmed_contig_7206 | 2.799.525.960 | glycine-rich protein a3-like                                     |
| PASMA_ACAGTG_L001_R1_001_trimmed_contig_7288 | 2.871.351.219 | ppgpp synthetase                                                 |
| PASMA_ACAGTG_L001_R1_001_trimmed_contig_736  | 2.843.012.198 | sec14 cytosolic factor family protein                            |
| PASMA_ACAGTG_L001_R1_001_trimmed_contig_7442 | 3.283.333.013 | coproporphyrinogen dehydrogenase                                 |
| PASMA_ACAGTG_L001_R1_001_trimmed_contig_7600 | 5.480.029.331 | gdsl esterase lipase at1g71250-like                              |
| PASMA_ACAGTG_L001_R1_001_trimmed_contig_7666 | 5.981.989.751 | transposase                                                      |

---

|                                               |                |                                                         |
|-----------------------------------------------|----------------|---------------------------------------------------------|
| PASMA_ACAGTG_L001_R1_001_trimmed_contig_7667  | 4.732.269.993  | complex i intermediate-associated protein mitochondrial |
| PASMA_ACAGTG_L001_R1_001_trimmed_contig_7845  | 5.047.352.389  | n-acetylglucosamine-6-sulfatase-like                    |
| PASMA_ACAGTG_L001_R1_001_trimmed_contig_8235  | 2.478.170.188  | heat shock cognate 70 kda protein 2-like                |
| PASMA_ACAGTG_L001_R1_001_trimmed_contig_853   | 2.911.422.448  | sensor histidine kinase                                 |
| PASMA_ACAGTG_L001_R1_001_trimmed_contig_8608  | 10.918.548.032 | leucyl-trna synthetase                                  |
| PASMA_ACAGTG_L001_R1_001_trimmed_contig_8610  | 4.175.746.110  | probable polygalacturonase at3g15720-like               |
| PASMA_ACAGTG_L001_R1_001_trimmed_contig_8645  | 3.250.758.049  | histone h1 subtype 5                                    |
| PASMA_ACAGTG_L001_R1_001_trimmed_contig_9026  | 16.970.789.221 | protein spinster homolog 2 isoform 2                    |
| PASMA_ACAGTG_L001_R1_001_trimmed_contig_9117  | 3.919.826.731  | sugar transporter                                       |
| PASMA_ACAGTG_L001_R1_001_trimmed_contig_9183  | 2.029.298.834  | elongation factor 1-alpha                               |
| PASMA_ACAGTG_L001_R1_001_trimmed_contig_925   | 2.360.008.289  | sodium hydrogen exchanger 10                            |
| PASMA_ACAGTG_L001_R1_001_trimmed_contig_9460  | 4.315.269.824  | citrate glyoxysomal-like                                |
| PASMA_ACAGTG_L001_R1_001_trimmed_contig_99    | -3.616.913.314 | 26s ribosomal rna                                       |
| PASMA_ACAGTG_L001_R1_001_trimmed_contig_10540 | 2.237.109.091  | Potential non coding transcript                         |
| PASMA_ACAGTG_L001_R1_001_trimmed_contig_11775 | 6.469.633.567  | Potential non coding transcript                         |
| PASMA_ACAGTG_L001_R1_001_trimmed_contig_11873 | 3.484.475.906  | Potential non coding transcript                         |
| PASMA_ACAGTG_L001_R1_001_trimmed_contig_11950 | 4.048.948.214  | Potential non coding transcript                         |
| PASMA_ACAGTG_L001_R1_001_trimmed_contig_12235 | 56.020.446.967 | Potential non coding transcript                         |
| PASMA_ACAGTG_L001_R1_001_trimmed_contig_12480 | 3.979.389.874  | Potential non coding transcript                         |

---

|                                               |                |                                 |
|-----------------------------------------------|----------------|---------------------------------|
| PASMA_ACAGTG_L001_R1_001_trimmed_contig_12572 | 9.070.122.058  | Potential non coding transcript |
| PASMA_ACAGTG_L001_R1_001_trimmed_contig_12710 | 11.918.313.178 | Potential non coding transcript |
| PASMA_ACAGTG_L001_R1_001_trimmed_contig_12825 | 5.275.213.933  | Potential non coding transcript |
| PASMA_ACAGTG_L001_R1_001_trimmed_contig_13205 | 8.034.092.301  | Potential non coding transcript |
| PASMA_ACAGTG_L001_R1_001_trimmed_contig_13468 | 2.225.153.917  | Potential non coding transcript |
| PASMA_ACAGTG_L001_R1_001_trimmed_contig_140   | 2.021.857.712  | Potential non coding transcript |
| PASMA_ACAGTG_L001_R1_001_trimmed_contig_14314 | 13.479.470.016 | Potential non coding transcript |
| PASMA_ACAGTG_L001_R1_001_trimmed_contig_14349 | 5.470.934.289  | Potential non coding transcript |
| PASMA_ACAGTG_L001_R1_001_trimmed_contig_14458 | 5.866.741.765  | Potential non coding transcript |
| PASMA_ACAGTG_L001_R1_001_trimmed_contig_15162 | 10.174.575.111 | Potential non coding transcript |
| PASMA_ACAGTG_L001_R1_001_trimmed_contig_15167 | 9.813.223.429  | Potential non coding transcript |
| PASMA_ACAGTG_L001_R1_001_trimmed_contig_15329 | 16.383.953.208 | Potential non coding transcript |
| PASMA_ACAGTG_L001_R1_001_trimmed_contig_15913 | 20.320.013.026 | Potential non coding transcript |
| PASMA_ACAGTG_L001_R1_001_trimmed_contig_16223 | 9.630.381.492  | Potential non coding transcript |
| PASMA_ACAGTG_L001_R1_001_trimmed_contig_16755 | 11.399.704.922 | Potential non coding transcript |
| PASMA_ACAGTG_L001_R1_001_trimmed_contig_16841 | 20.970.553.555 | Potential non coding transcript |
| PASMA_ACAGTG_L001_R1_001_trimmed_contig_18365 | 7.050.559.681  | Potential non coding transcript |
| PASMA_ACAGTG_L001_R1_001_trimmed_contig_18798 | 7.900.646.301  | Potential non coding transcript |
| PASMA_ACAGTG_L001_R1_001_trimmed_contig_19019 | 8.456.127.568  | Potential non coding transcript |

---

|                                               |                |                                 |
|-----------------------------------------------|----------------|---------------------------------|
| PASMA_ACAGTG_L001_R1_001_trimmed_contig_19565 | 5.544.440.124  | Potential non coding transcript |
| PASMA_ACAGTG_L001_R1_001_trimmed_contig_2078  | 1.863.795.852  | Potential non coding transcript |
| PASMA_ACAGTG_L001_R1_001_trimmed_contig_20919 | 31.653.712.708 | Potential non coding transcript |
| PASMA_ACAGTG_L001_R1_001_trimmed_contig_21009 | 55.687.730.900 | Potential non coding transcript |
| PASMA_ACAGTG_L001_R1_001_trimmed_contig_21024 | 5.992.048.175  | Potential non coding transcript |
| PASMA_ACAGTG_L001_R1_001_trimmed_contig_21588 | 23.506.593.253 | Potential non coding transcript |
| PASMA_ACAGTG_L001_R1_001_trimmed_contig_2242  | 3.711.618.326  | Potential non coding transcript |
| PASMA_ACAGTG_L001_R1_001_trimmed_contig_22827 | 3.959.005.179  | Potential non coding transcript |
| PASMA_ACAGTG_L001_R1_001_trimmed_contig_23041 | 6.534.589.869  | Potential non coding transcript |
| PASMA_ACAGTG_L001_R1_001_trimmed_contig_23080 | 4.585.461.415  | Potential non coding transcript |
| PASMA_ACAGTG_L001_R1_001_trimmed_contig_23289 | 14.319.905.961 | Potential non coding transcript |
| PASMA_ACAGTG_L001_R1_001_trimmed_contig_23701 | 3.696.293.416  | Potential non coding transcript |
| PASMA_ACAGTG_L001_R1_001_trimmed_contig_24043 | 16.520.475.593 | Potential non coding transcript |
| PASMA_ACAGTG_L001_R1_001_trimmed_contig_24383 | 14.081.369.764 | Potential non coding transcript |
| PASMA_ACAGTG_L001_R1_001_trimmed_contig_24436 | 10.348.250.027 | Potential non coding transcript |
| PASMA_ACAGTG_L001_R1_001_trimmed_contig_25030 | 22.720.572.816 | Potential non coding transcript |
| PASMA_ACAGTG_L001_R1_001_trimmed_contig_25613 | 19.118.149.199 | Potential non coding transcript |
| PASMA_ACAGTG_L001_R1_001_trimmed_contig_2913  | 11.554.569.389 | Potential non coding transcript |
| PASMA_ACAGTG_L001_R1_001_trimmed_contig_29187 | 6.120.144.592  | Potential non coding transcript |

---

|                                               |                |                                 |
|-----------------------------------------------|----------------|---------------------------------|
| PASMA_ACAGTG_L001_R1_001_trimmed_contig_30089 | 44.243.512.100 | Potential non coding transcript |
| PASMA_ACAGTG_L001_R1_001_trimmed_contig_3081  | 5.297.002.300  | Potential non coding transcript |
| PASMA_ACAGTG_L001_R1_001_trimmed_contig_31691 | 49.107.898.241 | Potential non coding transcript |
| PASMA_ACAGTG_L001_R1_001_trimmed_contig_32081 | 51.790.111.158 | Potential non coding transcript |
| PASMA_ACAGTG_L001_R1_001_trimmed_contig_3283  | 2.826.577.318  | Potential non coding transcript |
| PASMA_ACAGTG_L001_R1_001_trimmed_contig_341   | 5.200.750.995  | Potential non coding transcript |
| PASMA_ACAGTG_L001_R1_001_trimmed_contig_3550  | 3.196.020.520  | Potential non coding transcript |
| PASMA_ACAGTG_L001_R1_001_trimmed_contig_409   | 22.214.426.724 | Potential non coding transcript |
| PASMA_ACAGTG_L001_R1_001_trimmed_contig_4318  | 2.868.746.353  | Potential non coding transcript |
| PASMA_ACAGTG_L001_R1_001_trimmed_contig_4613  | 2.197.650.388  | Potential non coding transcript |
| PASMA_ACAGTG_L001_R1_001_trimmed_contig_55    | 1.269.854.226  | Potential non coding transcript |
| PASMA_ACAGTG_L001_R1_001_trimmed_contig_5989  | 2.411.633.448  | Potential non coding transcript |
| PASMA_ACAGTG_L001_R1_001_trimmed_contig_6330  | 2.571.334.550  | Potential non coding transcript |
| PASMA_ACAGTG_L001_R1_001_trimmed_contig_6644  | 3.450.602.680  | Potential non coding transcript |
| PASMA_ACAGTG_L001_R1_001_trimmed_contig_6828  | 6.120.247.422  | Potential non coding transcript |
| PASMA_ACAGTG_L001_R1_001_trimmed_contig_7185  | 6.220.378.174  | Potential non coding transcript |
| PASMA_ACAGTG_L001_R1_001_trimmed_contig_7376  | 7.151.975.139  | Potential non coding transcript |
| PASMA_ACAGTG_L001_R1_001_trimmed_contig_806   | 3.802.375.701  | Potential non coding transcript |
| PASMA_ACAGTG_L001_R1_001_trimmed_contig_8101  | 3.067.231.716  | Potential non coding transcript |

---

|                                              |                |                                 |
|----------------------------------------------|----------------|---------------------------------|
| PASMA_ACAGTG_L001_R1_001_trimmed_contig_824  | 90.090.250.563 | Potential non coding transcript |
| PASMA_ACAGTG_L001_R1_001_trimmed_contig_8245 | 4.254.573.953  | Potential non coding transcript |
| PASMA_ACAGTG_L001_R1_001_trimmed_contig_8325 | 3.128.048.025  | Potential non coding transcript |
| PASMA_ACAGTG_L001_R1_001_trimmed_contig_8423 | 3.795.398.057  | Potential non coding transcript |
| PASMA_ACAGTG_L001_R1_001_trimmed_contig_8531 | 4.473.062.054  | Potential non coding transcript |
| PASMA_ACAGTG_L001_R1_001_trimmed_contig_8973 | 3.520.901.115  | Potential non coding transcript |
| PASMA_ACAGTG_L001_R1_001_trimmed_contig_914  | 2.563.114.982  | Potential non coding transcript |
| PASMA_ACAGTG_L001_R1_001_trimmed_contig_9578 | 2.546.909.869  | Potential non coding transcript |
| PASMA_ACAGTG_L001_R1_001_trimmed_contig_9738 | 2.757.571.212  | Potential non coding transcript |
| PASMA_ACAGTG_L001_R1_001_trimmed_contig_9843 | 2.802.980.534  | Potential non coding transcript |

---

**Table S4.** Transcripts differentially expressed associated with *Solanum paniculatum* osmoprimed (−1.0 MPa) seeds.

| Contig | Annotation                                                  | Fold Change     | Type of Stress                       |
|--------|-------------------------------------------------------------|-----------------|--------------------------------------|
| 10620  | CHALCONE ISOMERASE                                          | 1.051.406.015   | drought and oxidativestresses        |
| 1056   | POLY [ADP-RIBOSE] POLYMERASE 3-LIKE                         | 88.530.826.654  | drought and oxidativestresses        |
| 14206  | GALACTINOL SYNTHASE                                         | 7.419.015.896   | drought stress                       |
| 15325  | REPLICATION PROTEIN A 70 KDA DNA-BINDING SUBUNIT B-LIKE     | 1.951.054.877   | heat stress                          |
| 1719   | NON-SPECIFIC LIPID-TRANSFER PROTEIN 2-LIKE                  | 351.509.254     | drought stress                       |
| 1801   | KDA CLASS I HEAT SHOCK PROTEIN 3                            | 4.975.597.707   | heat stress                          |
| 20743  | NAD-GLUTAMATE DEHYDROGENASE                                 | 4.398.382.668   | drought stress                       |
| 2645   | TRANSLOCATOR PROTEIN HOMOLOG                                | 2.682.734.698   | salt stress                          |
| 2884   | HMG1 2-LIKE                                                 | 3.731.276.497   | salt and drought stresses            |
| 2688   | ASPARTIC PROTEINASE                                         | 2.473.415.257   | drought stress                       |
| 3485   | PEROXIDASE 12-LIKE                                          | 2.173.200.672   | drought and oxidativestresses        |
| 3929   | DNAJ PROTEIN HOMOLOG 2-LIKE                                 | 2.597.506.807   | heat stress                          |
| 4082   | COLD SHOCK PROTEIN CS66-LIKE                                | 2.255.207.958   | heat stress                          |
| 5291   | LOW-TEMPERATURE-INDUCED 65 KDA PROTEIN                      | 2.034.738.089   | heat stress                          |
| 5927   | NUCLEAR POLYADENYLATED RNA-BINDING PROTEIN 4-LIKE ISOFORM 1 | 3.803.126.296   | oxidative, salt and drought stresses |
| 6440   | PHENYLANINE AMMONIA-LYASE 1-LIKE                            | 7.787.390.449   | oxidative stress                     |
| 6576   | HEAT SHOCK FACTOR PROTEIN HSF30-LIKE                        | 7.244.611.783   | heat stress                          |
| 6590   | ASPARTATE AMINOTRANSFERASE                                  | 3.518.266.039   | drought stress                       |
| 7098   | THIAMINE THIAZOLE SYNTHASE CHLOROPLASTIC-LIKE               | 5.321.197.489   | drought stress                       |
| 7206   | GLYCINE-RICH PROTEIN A3-LIKE                                | 279.952.596     | salt stress                          |
| 7288   | PPGPP SYNTHETASE                                            | 2.871.351.219   | salt stress                          |
| 8235   | HEAT SHOCK COGNATE 70 KDA PROTEIN 2-LIKE                    | 2.478.170.188   | heat stress                          |
| 853    | SENSOR HISTIDINE KINASE                                     | 2.911.422.448   | salt stress and drought stress       |
| 9460   | CITRATE GLYOXYSOMAL-LIKE                                    | 4.315.269.824   | drought stress and oxidative stress  |
| 448    | NAD(P)H DEHYDROGENASE (QUINONE) FQR1-LIKE 1                 | −26.626.873.804 | Metabolism                           |
| 5548   | SMALL HEAT SHOCK PROTEIN                                    | −53.082.952.951 | Longevity                            |
| 99     | 26S RIBOSOMAL RNA                                           | −3.616.913.314  | Translation                          |
